# Supplementary material
Source: MDPI journal article supplement (https://www.mdpi.com/2079-6439/11/4/32)
Supplement: s1 [file s1]

## **Supplementary Information**

### **Adsorption Studies of Ammonia, Protein, and Phytic Acid using Chitosan Fiber Coated with Oxidized Cellulose Nanofiber**

**Duangkamol Dechojarassri, Kensuke Nishida, Ryousuke Ozakiya,  
Tetsuya Furuike, Hiroshi Tamura\***

Faculty of Chemistry, Materials and Bioengineering, Kansai University, Osaka, 564-8680, Japan

\*Corresponding author: E-mail: tamura@kansai-u.ac.jp, Tel.: +81 6 6368 0871

#### **Supplementary information figure captions**

**Figure S1** † The single-line-knotted fiber for surface ZP measurement.

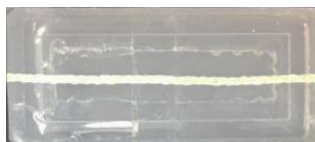

**Figure S1 †** The single-line-knotted fiber for surface ZP measurement.
